# Supplementary material
Source: Research Square preprint supplement (doi:10.21203/rs.3.rs-8976112/v1)
Supplement: Supplementary file 1 [file 2dc6ab7ab0b631482993166b.docx]

**Supplemental Material**





**Supplemental Figure 1. Changes in the LVEF during the 2-year follow-up period.**

**A** LVEF improvements in the three groups. **B** Reduction in the LVEF difference between the two LVEF < 35% groups and the non-ECMO + LVEF > 35% group. **C** LVEF improvements in the LVEF < 35% subgroup and the LVEF > 35% subgroup, and **D** the reduction in the two subgroups.
